# Supplementary material for: A facile, solvent vapor–fumigation-induced, self-repair recrystallization of CH3NH3PbI3films for high-performance perovskite solar cells
Source: Royal Society of Chemistry journal article supplement (doi:10.1039/c5nr00225g), 2015-01-01
Supplement: c5nr00225g1.pdf [file c5nr00225g1.pdf]

## Supplementary Information

### **A Facile Solvent Vapor Fumigation Induced Self-repair Recrystallization of CH<sub>3</sub>NH<sub>3</sub>PbI<sub>3</sub> Films for High Performance Perovskite Solar Cells**

Weidong Zhu,<sup>a</sup> Tao Yu,<sup>\*abc</sup> Faming Li,<sup>a</sup> Chunxiong Bao,<sup>a</sup> Hao Gao,<sup>a</sup> Yong Yi,<sup>a</sup> Jie Yang,<sup>a</sup> Gao Fu,<sup>a</sup> Xiaoxin Zhou<sup>a</sup> and Zhigang Zou<sup>abc</sup>

*<sup>a</sup>National Laboratory of Solid State Microstructures & Eco-Materials and Renewable Energy*

*Research Center (ERERC) at Department of Physics, Nanjing University, Nanjing 210093, P. R.*

*China. E-mail: yutao@nju.edu.cn*

*<sup>b</sup>Collaborative Innovation Center of Advanced Microstructures, Nanjing University, Nanjing*

*210093, P. R. China.*

*<sup>c</sup>Jiangsu Key Laboratory for Nano Technology, Nanjing 210093, P. R. China.*

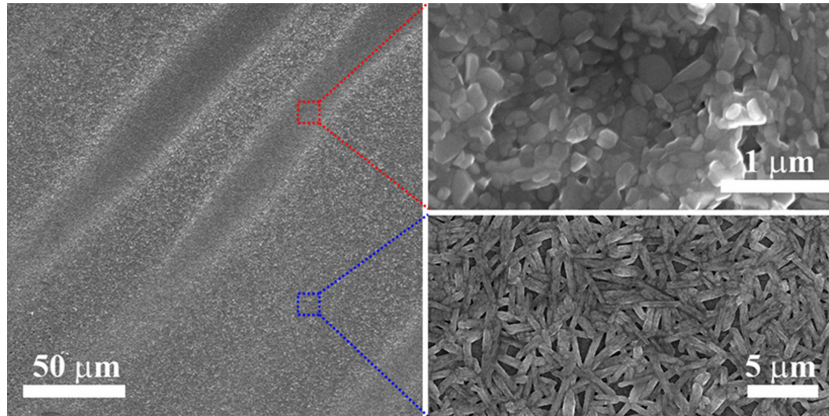

**Figure S1** Surface SEM images of the  $\text{CH}_3\text{NH}_3\text{PbI}_3$  film after ten cycles of recrystallization treatment (sample C10).

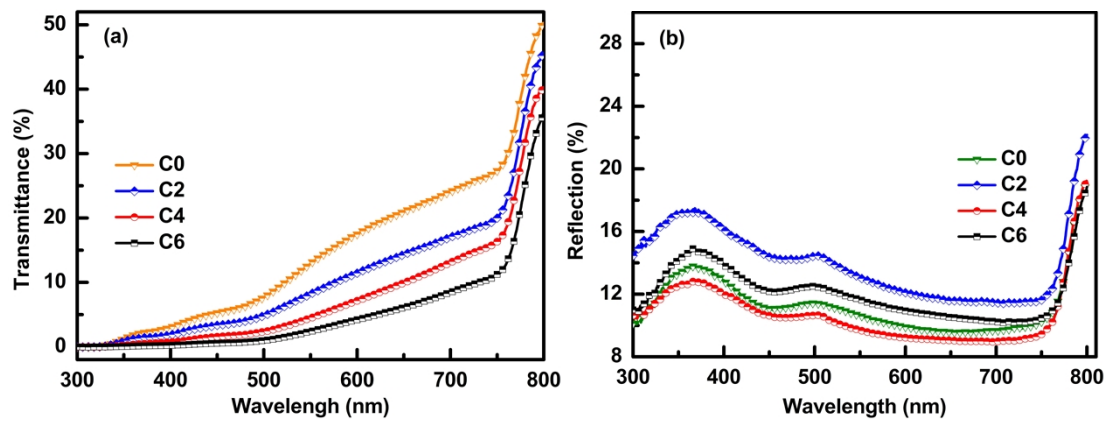

**Figure S2** (a) Transmittance spectra and (b) reflection spectra of the samples C0, C2, C4, and C6, respectively.

**Table S1** Photovoltaic parameters obtained at forward scan (FS) and reverse scan (RS) for the perovskite solar cells based the samples of C0, C2, C4, and C6, respectively.<sup>a</sup>

| Sample | Scan | J <sub>sc</sub> (mA cm <sup>-2</sup> ) | V <sub>oc</sub> (V) | FF   | PCE (%) | HI   |
|--------|------|----------------------------------------|---------------------|------|---------|------|
| C0     | RS   | 12.46                                  | 0.83                | 0.49 | 5.07    | 0.29 |
|        | FS   | 13.91                                  | 0.78                | 0.35 | 3.77    |      |
| C2     | RS   | 15.62                                  | 0.85                | 0.54 | 7.28    | 0.19 |
|        | FS   | 16.80                                  | 0.78                | 0.43 | 5.61    |      |
| C4     | RS   | 18.38                                  | 0.87                | 0.56 | 8.93    | 0.09 |
|        | FS   | 17.52                                  | 0.87                | 0.57 | 8.70    |      |
| C6     | RS   | 19.54                                  | 0.91                | 0.58 | 10.28   | 0.03 |
|        | FS   | 20.33                                  | 0.88                | 0.56 | 10.08   |      |

<sup>a</sup>The I-V hysteresis index (HI) is defined as:  $HI = (J_{RS}(V_{oc}/2) - J_{FS}(V_{oc}/2)) / J_{RS}(V_{oc}/2)$ , where  $J_{RS}(V_{oc}/2)$  and  $J_{FS}(V_{oc}/2)$  represent the photocurrent densities at 50% of  $V_{oc}$  for the RS and FS, respectively.<sup>1,2</sup>

**Table S2** Device photovoltaic parameters based on 20 solar cells based the sample C6 among 4 batches.

| Devices | V <sub>oc</sub> (V) | J <sub>sc</sub> (mA cm <sup>-2</sup> ) | FF   | PCE (%) |
|---------|---------------------|----------------------------------------|------|---------|
| 1-1#    | 0.86                | 18.44                                  | 0.60 | 9.49    |
| 1-2#    | 0.84                | 18.53                                  | 0.58 | 9.02    |
| 1-3#    | 0.87                | 18.95                                  | 0.58 | 9.63    |
| 1-4#    | 0.87                | 19.30                                  | 0.66 | 11.08   |
| 1-5#    | 0.89                | 19.46                                  | 0.64 | 11.03   |
| 2-1#    | 0.87                | 19.48                                  | 0.63 | 10.66   |
| 2-2#    | 0.86                | 19.45                                  | 0.64 | 10.69   |
| 2-3#    | 0.85                | 19.62                                  | 0.66 | 10.99   |
| 2-4#    | 0.85                | 18.85                                  | 0.67 | 10.67   |
| 2-5#    | 0.86                | 18.89                                  | 0.66 | 10.64   |
| 3-1#    | 0.85                | 18.03                                  | 0.66 | 10.05   |
| 3-2#    | 0.86                | 19.20                                  | 0.62 | 10.21   |
| 3-3#    | 0.84                | 19.05                                  | 0.65 | 10.40   |
| 3-4#    | 0.87                | 19.42                                  | 0.66 | 11.15   |
| 3-5#    | 0.84                | 19.19                                  | 0.62 | 9.97    |
| 4-1#    | 0.84                | 19.31                                  | 0.63 | 10.24   |
| 4-2#    | 0.91                | 19.34                                  | 0.54 | 9.51    |
| 4-3#    | 0.90                | 20.18                                  | 0.55 | 10.00   |
| 4-4#    | 0.84                | 20.66                                  | 0.55 | 9.56    |
| 4-5#    | 0.90                | 20.58                                  | 0.57 | 10.56   |

## References

1. H. S. Kim and N. G. Park, *The Journal of Physical Chemistry Letters*, 2014, **5**, 2927-2934.
2. R. S. Sanchez, V. Gonzalez Pedro, J. W. Lee, N. G. Park, Y. S. Kang, I. Mora Sero and J. Bisquert, *The Journal of Physical Chemistry Letters*, 2014, **5**, 2357-2363.
